# Supplementary material
Source: Copernicus journal article supplement (doi:10.5194/essd-2026-261)
Supplement: Supplementary file 1 [file essd-2026-261-supplement.pdf]

# A global high-resolution temperature and salinity reconstruction by spatiotemporal multiscale correlations and dynamic height constraints

Haowen Wu<sup>1</sup>, Wei Li<sup>1\*</sup>, Hong Li<sup>1\*</sup>, Guijun Han<sup>1</sup>, Gongfu Zhou<sup>1</sup>, Hanyu Liu<sup>1</sup>, Lige Cao<sup>1</sup>, Qingyu Zheng<sup>1</sup>

<sup>1</sup>Tianjin Key Laboratory for Marine Environmental Research and Service, School of Marine Science and Technology, Tianjin University, Tianjin, China

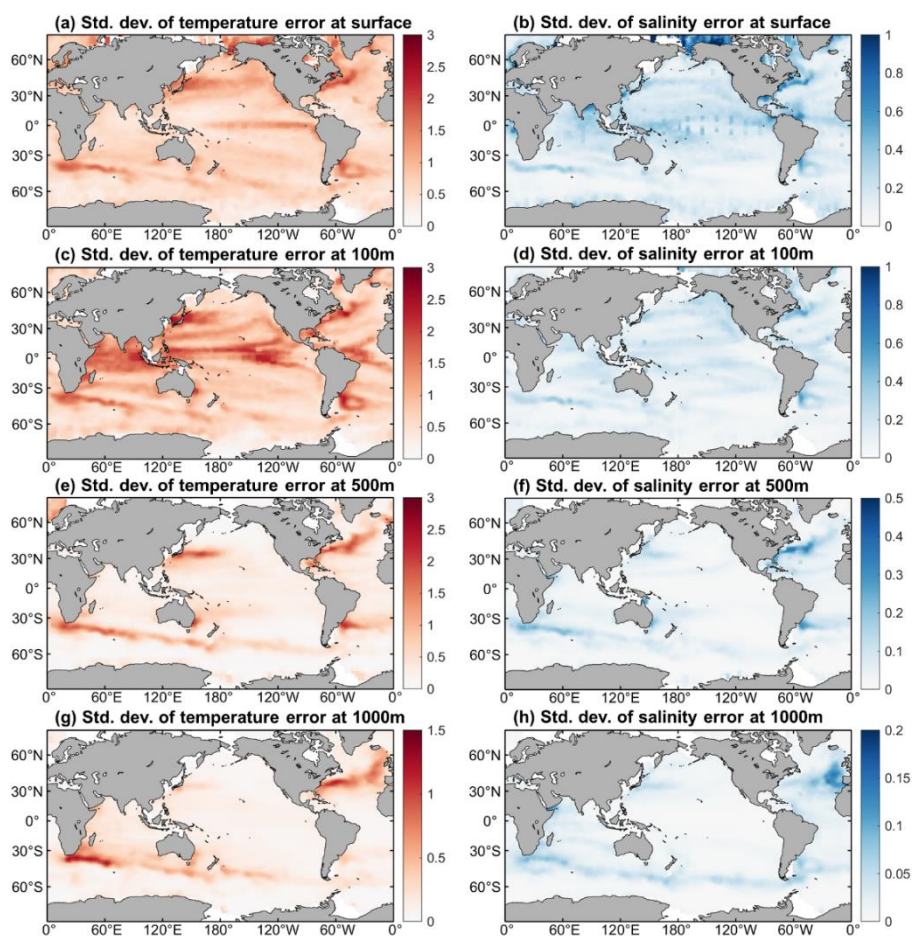

Figure S1. Standard deviation ( $2^\circ \times 2^\circ$  average) of temperature/salinity profile errors against the WOA23, displayed at the surface (a, b), 100 m (c, d), 500 m (e, f), and 1000 m (g, h).

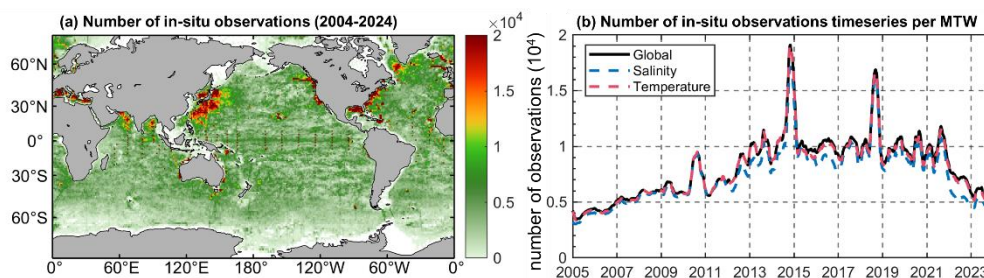

Figure S2. (a)  $1^\circ \times 1^\circ$  binned spatial distribution of total in-situ observations. (b) Timeseries of the global number of profiles per MTW: total profiles (black solid line), temperature profiles (red dashed line), and

salinity profiles (blue dashed lines).

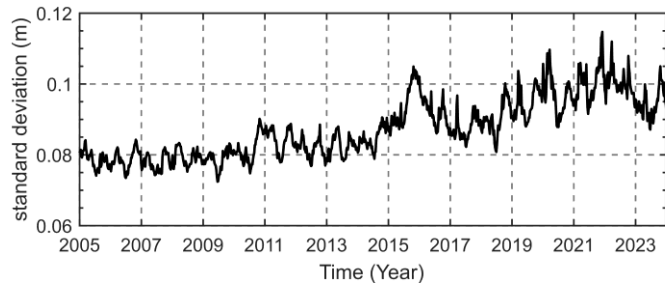

Figure S3. Spatially averaged standard deviation of the AVISO level-4 SLA.

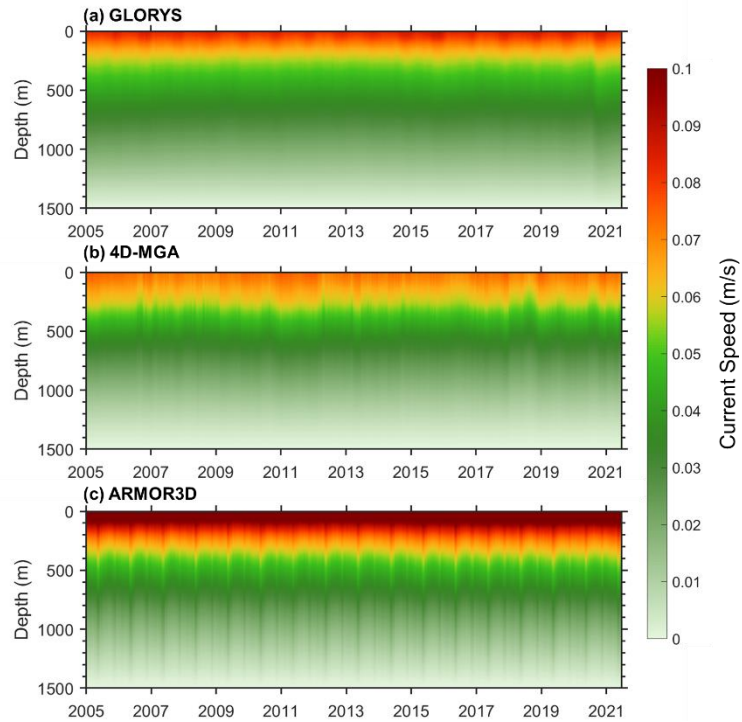

Figure S4. Timeseries of horizontally averaged geostrophic current speed over 2005–2021 for GLORYS (a), 4D-MGA (b) and ARMOR3D (c).
